# Supplementary material
Source: publisher figshare collection journal article supplement (https://springernature.figshare.com/ndownloader/files/17600120)
Supplement: Supplementary file [file 17600120]

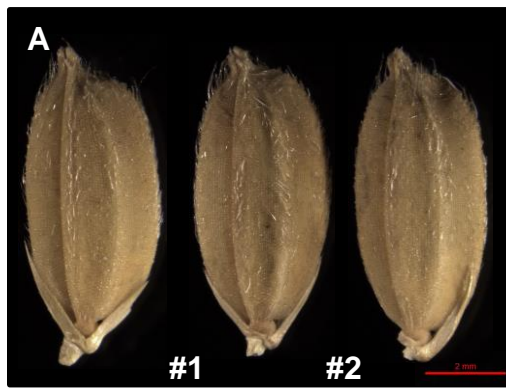

ZH11

*NAL8<sup>CRISPR</sup>*

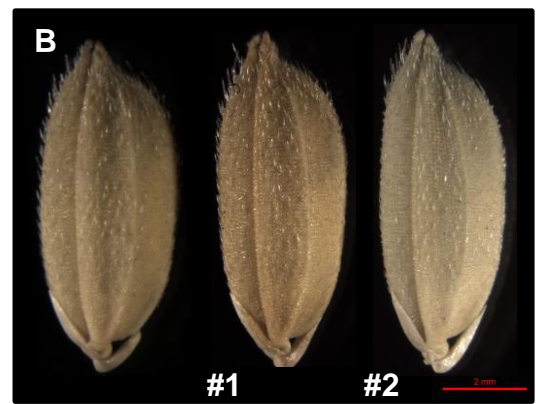

TQ

*NAL8<sup>RNAi</sup>*

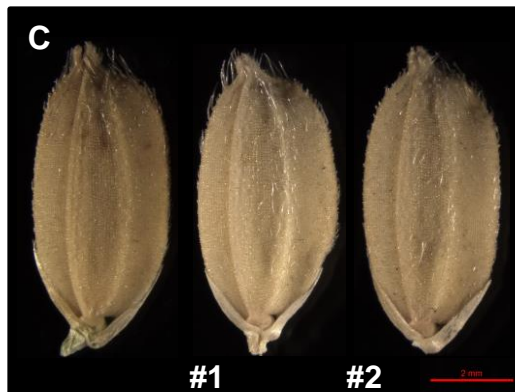

ZH11

*NAL8<sup>OE</sup>*

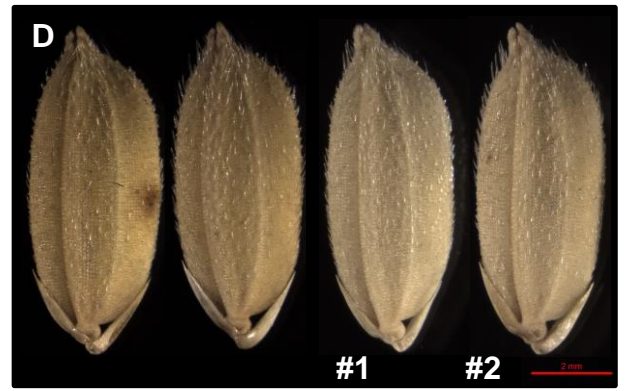

TQ

*nal8*

*NAL8<sup>com</sup>*
